# Supplementary material
Source: PubMed Central journal article supplement (PMC10063833)

## Supplementary Materials

### Amyloid PET imaging

All subjects also underwent [<sup>11</sup>C]Pittsburgh Compound B (PiB) PET imaging over 60 min, as previously described [29,30]. An average measure of global amyloid- $\beta$  burden was estimated in a large neocortical aggregate of frontal, lateral temporoparietal and retrosplenial (FLR) regions, based on distribution volume ratios (DVR) computed using the reference Logan graphical method, with the CerGM as reference region ( $t^* = 40$  min). Subjects with PiB DVR values in the FLR region greater than 1.13 were considered as PiB-positive. The 1.13 threshold was determined by applying gaussian mixture model to all available [<sup>11</sup>C]PiB DVR data ( $n = 268$ ) collected on the same scanner as this study.

### Spectral analysis

Spectral analysis is a data-driven method for evaluating tracer kinetics without assumptions on kinetic compartment configuration. In spectral analysis, tracer activity ( $C_T(t)$ ) in the tissue at time  $t$  is described as the convolution of the tracer activity in the plasma ( $C_P(t)$ ) and the impulse response function (IRF( $t$ )):

$$C_T(t) = C_P(t) \otimes \text{IRF}(t) \quad (1)$$

IRF( $t$ ) contains information about the kinetics of the tissue in response to tracer delivery and can be solved as an analytical sum of distinct exponential terms:

$$\text{IRF}(t) = \sum_{j=0}^M \alpha_j e^{-\beta_j t} \quad (2)$$

Where  $\beta_j$  ( $\beta_0 = 0, \beta_j \geq 0$ , unit  $\text{min}^{-1}$ ) are the frequency of the spectral components and  $\alpha_j$  (unit  $\text{mL cm}^{-3} \text{min}^{-1}$ ) are the corresponding amplitudes.  $M + 1$  is the maximum number of terms in the model. The values of  $\beta_j$  are predefined to cover a range of spectral frequencies from:

- Very large  $\beta_j$ : high frequency spectral components, which correspond to blood volume fraction
- Very small  $\beta_j$ : low frequency spectral components, which often correspond to irreversible trapping in the tissue compartments
- Intermediate  $\beta_j$ : spectral components in equilibrium, which indicate the number of identifiable reversible tissue compartments

After fixing the values of  $\beta_j$  to cover an appropriate spectral range, the  $\alpha_j$  values were estimated from  $C_T(t)$  and  $C_P(t)$  by using non-negative least square (NNLS) algorithm. Several macro-parameters can then be derived from the kinetic spectrum:

- Influx rate constant:  $K_{1\_SA} = \sum_{j=0}^M \alpha_j$ , unit:  $\text{mL cm}^{-3} \text{min}^{-1}$  (3)

- Volume of distribution  $V_{T\_SA} = \sum_{j=0}^M \alpha_j / \beta_j$ , unit:  $\text{mL cm}^{-3}$  (4)

In this study, spectral analysis was implemented using a pre-defined grid of 100 components for  $\beta_j$ , ranging from  $10^{-5}$  to  $1 \text{ min}^{-1}$  on a logarithmic scale.

### Effect size calculation (Hedge's g coefficients)

Due to the small sample size, effect sizes were estimated using Hedge's g coefficients using the formula:

$$g = J(df) \times \frac{(\bar{x} - \bar{y})}{s}$$

where  $df$  is the degree of freedom,  $\bar{x}$  and  $\bar{y}$  are the mean values for each group or time point,  $s$  is the pooled standard deviation and  $J(df)$  is the bias correction term. The pooled standard deviation and the bias correction term are defined as follows:

$$s = \sqrt{\frac{(n_1 - 1)S_1^2 + (n_2 - 1)S_2^2}{n_1 + n_2 - 2}}$$

where  $n_1$  and  $n_2$  are the sample size of each group or time point.

$$J(df) = \frac{(\Gamma(\frac{df}{2}))}{\sqrt{df/2\Gamma(\frac{df-1}{2})}}$$

where  $\Gamma$  is the gamma function.

The 95% confidence interval for the  $g$  coefficients was estimated using bootstrapping (1000 iterations).

**Supplementary Table 1.** Published [<sup>18</sup>F]MK-6240 human PET imaging studies: Imaging parameters and reference regions.

| Author, year          | Journal †                        | Tomograph                                       | FWHM *               | Acquisition duration         | SUVR **                       | Reference region                |
|-----------------------|----------------------------------|-------------------------------------------------|----------------------|------------------------------|-------------------------------|---------------------------------|
| Pascoal 2018          | Alzheimer's Research and Therapy | Siemens HRRT                                    | 8mm after smoothing  | Up to 180 min                | Varied, 90-110 min chosen     | Cerebellar gray matter          |
| Bethhauser 2019, 2020 | J Nucl Med                       | Siemens ECAT Exact HR+                          | 5 mm                 | Up to 120 min                | 70-90 min                     | Inferior cerebellar gray matter |
| Lohith 2019           | J Nucl Med                       | Siemens Hirez Biograph                          | 5 mm                 | 0-90 min, break, 120-150 min | 60-90 min                     | Cerebellar gray matter          |
| Guehl 2019            | EJNMMI                           | 1. Siemens ECAT Exact HR+<br>2. GE Discovery MI | 1. 5mm<br>2. 5mm     | Up to 135 min                | 1. 70-90 min<br>2. 90-120 min | Cerebellar gray matter          |
| Salinas 2020 ^        | JCBFM                            | Siemens ECAT Exact HR+                          | 5 mm                 | Up to 150 min                | 90-120 min                    | Inferior cerebellar gray matter |
| Pascoal 2020          | Brain                            | Siemens HRRT                                    | 8mm after smoothing  | 90-110 min                   | 90-110 min                    | Inferior cerebellum             |
| Pascoal 2021          | Nature Medicine                  | Siemens HRRT                                    | 8 mm after smoothing | 90-110 min                   | 90-110 min                    | Cerebellar Crus I gray matter   |
| Therriault 2021 ^^    | Neurology                        | Siemens HRRT                                    | 8 mm after smoothing | 90-110 min                   | 90-110 min                    | Inferior cerebellar gray matter |
| Gogola 2021           | J Nucl Med                       | Siemens ECAT Exact HR+                          | 5 mm                 | 70-90 min                    | 70-90 min                     | Cerebellar gray matter          |
| Smith 2021            | NeuroImage: Clinical             | Siemens ECAT Exact HR+                          | 5 mm                 | 70-90 min                    | 70-90 min                     | Inferior cerebellar gray matter |
| Mertens 2022 ^^       | JCBFM                            | GE Signa PET/MR                                 | 4 mm                 | 90-120 min                   | 90-120 min                    | Cerebellar gray matter          |

† J Nucl Med: Journal of Nuclear Medicine; EJNMMI: European Journal of Nuclear Medicine and Molecular Imaging; JCBFM: Journal of Cerebral Blood Flow and Metabolism. \* FWHM = full width at half maximum. \*\*SUVR = standardized uptake value ratio. ^ Salinas et.al., 2020: Only example here to apply a 5 mm cerebellar erosion from the outermost voxels. ^^ Examples here to apply region- and voxel- level partial volume correction on the PET data.

**Supplementary Table 2.** Comparative size (in voxels) of the candidate reference regions and extracerebral masks in the PET space, for a representative subject.

|                                    | <b>CerGM</b> | <b>CerGM<sub>3mm</sub></b> | <b>InfCer</b> | <b>WM</b> | <b>WM<sub>4mm</sub></b> | <b>Pons</b> | <b>Extracerebral</b> |
|------------------------------------|--------------|----------------------------|---------------|-----------|-------------------------|-------------|----------------------|
| <b>ROI size (number of voxels)</b> | 22566        | 6556                       | 10174         | 88295     | 15310                   | 3014        | 121544               |

**Supplementary Table 3.** Baseline SUV<sub>90-110</sub>, longitudinal changes of SUV<sub>90-110</sub> in candidate reference regions and extracerebral signal at 6-month and 1-year follow-ups.

|                            |               | Baseline SUV <sub>90-110</sub><br>(g/mL) (n=32: 24<br>CN, 8 AD/MCI) | ΔSUV <sub>90-110</sub> at 6-month<br>(n=25: 20 CN, 5<br>AD/MCI) | ΔSUV <sub>90-110</sub> at 1-year<br>(n=16: 11 CN, 5<br>AD/MCI) |
|----------------------------|---------------|---------------------------------------------------------------------|-----------------------------------------------------------------|----------------------------------------------------------------|
| <b>CerGM</b>               | <b>CN</b>     | 0.62±0.12                                                           | 0.04±0.07                                                       | 0.04±0.13                                                      |
|                            | <b>AD/MCI</b> | 0.59±0.17                                                           | (-0.09, 0.18)                                                   | (-0.15, 0.26)                                                  |
| <b>CerGM<sub>3mm</sub></b> | <b>CN</b>     | 0.53±0.13                                                           | 0.05±0.06                                                       | 0.04±0.11                                                      |
|                            | <b>AD/MCI</b> | 0.51±0.17                                                           | (-0.10, 0.16)                                                   | (-0.10, 0.26)                                                  |
| <b>PVC CerGM</b>           | <b>CN</b>     | 0.54±0.20                                                           | 0.03±0.14                                                       | -0.002±0.17                                                    |
|                            | <b>AD/MCI</b> | 0.62±0.26                                                           | (-0.32, 0.25)                                                   | (-0.22, 0.36)                                                  |
| <b>Inferior CerGM</b>      | <b>CN</b>     | 0.67±0.13                                                           | 0.04±0.08                                                       | 0.04±0.13                                                      |
|                            | <b>AD/MCI</b> | 0.59±0.17                                                           | (-0.12, 0.22)                                                   | (-0.10, 0.24)                                                  |
| <b>WM</b>                  | <b>CN</b>     | 0.44±0.09*                                                          | 0.05±0.06                                                       | 0.02±0.11                                                      |
|                            | <b>AD/MCI</b> | 0.75±0.20*                                                          | (-0.05, 0.16)                                                   | (-0.24, 0.21)                                                  |
| <b>WM<sub>4mm</sub></b>    | <b>CN</b>     | 0.42±0.11                                                           | 0.05±0.05                                                       | 0.02±0.10                                                      |
|                            | <b>AD/MCI</b> | 0.51±0.15                                                           | (-0.04, 0.17)                                                   | (-0.25, 0.20)                                                  |
| <b>PVC WM</b>              | <b>CN</b>     | 0.34±0.14                                                           | 0.02±0.09                                                       | -0.01±0.12                                                     |
|                            | <b>AD/MCI</b> | 0.56±0.10                                                           | (-0.22, 0.20)                                                   | (-0.28, 0.19)                                                  |
| <b>Pons</b>                | <b>CN</b>     | 0.29±0.07                                                           | 0.02±0.05                                                       | -0.002±0.07                                                    |
|                            | <b>AD/MCI</b> | 0.32±0.09                                                           | (-0.06, 0.08)                                                   | (-0.16, 0.13)                                                  |
| <b>PVC Pons</b>            | <b>CN</b>     | 0.18±0.09                                                           | 0.02±0.06                                                       | -0.01±0.09                                                     |
|                            | <b>AD/MCI</b> | 0.27±0.09                                                           | (-0.11, 0.13)                                                   | (-0.19, 0.16)                                                  |
| <b>Extracerebral</b>       | <b>CN</b>     | 0.79±0.15                                                           | 0.01±0.12                                                       | 0.0002±0.16                                                    |
|                            | <b>AD/MCI</b> | 0.74±0.17                                                           | (-0.22, 0.39)                                                   | (-0.20, 0.38)                                                  |

\* = significantly different between the CN and AD/MCI groups. Baseline SUV<sub>90-110</sub> are reported as mean±std and longitudinal changes are reported as mean±std (min, max).

**Supplementary Table 4.** Target region distribution volume ratio (DVR) and SUVR<sub>90-110</sub> values (entorhinal, amygdala, inferior temporal and precuneus) for each candidate reference region in the CN and AD/MCI groups. Target region DVR were calculated using two-tissue compartmental model (2TCM), Logan graphical analysis, reference tissue methods (multilinear reference tissue modeling (MRTM2) and reference Logan graphical analysis) and SUVR using the 90-110 min of dynamic data.

|                              | CerGM     |           | CerGM3mm  |           | InfCer    |           | WM        |           | WM <sub>4mm</sub> |           | Pons      |           |
|------------------------------|-----------|-----------|-----------|-----------|-----------|-----------|-----------|-----------|-------------------|-----------|-----------|-----------|
|                              | CN        | AD/MCI    | CN        | AD/MCI    | CN        | AD/MCI    | CN        | AD/MCI    | CN                | AD/MCI    | CN        | AD/MCI    |
| <b>2TCM DVR</b>              |           |           |           |           |           |           |           |           |                   |           |           |           |
| Entorhinal                   | 1.1±0.21  | 1.57±0.44 | 1.25±0.33 | 1.74±0.52 | 1.01±0.15 | 1.55±0.42 | 1.56±0.4  | 1.76±0.35 | 1.86±0.61         | 2.32±0.7  | 2±0.52    | 2.5±0.89  |
| Amygdala                     | 0.79±0.22 | 1.35±0.57 | 0.89±0.25 | 1.49±0.63 | 0.74±0.24 | 1.33±0.57 | 1.1±0.23  | 1.51±0.6  | 1.31±0.4          | 1.99±0.9  | 1.4±0.31  | 2.17±1.11 |
| Inferior Temporal            | 1.27±0.28 | 2.06±1.08 | 1.45±0.43 | 2.29±1.28 | 1.16±0.21 | 2.02±1.04 | 1.81±0.51 | 2.26±0.99 | 2.15±0.77         | 3.05±1.71 | 2.31±0.68 | 3.32±1.99 |
| Precuneus                    | 0.92±0.1  | 1.56±0.97 | 1.04±0.13 | 1.75±1.15 | 0.86±0.13 | 1.53±0.93 | 1.3±0.16  | 1.71±0.91 | 1.54±0.26         | 2.34±1.54 | 1.67±0.25 | 2.54±1.76 |
| <b>Logan DVR</b>             |           |           |           |           |           |           |           |           |                   |           |           |           |
| Entorhinal                   | 1.02±0.08 | 1.53±0.44 | 1.18±0.15 | 1.67±0.66 | 0.91±0.11 | 1.51±0.41 | 1.61±0.33 | 1.69±0.4  | 1.84±0.44         | 2.31±0.93 | 2.03±0.42 | 2.51±1.04 |
| Amygdala                     | 0.75±0.21 | 1.27±0.5  | 0.87±0.25 | 1.37±0.6  | 0.68±0.21 | 1.26±0.53 | 1.16±0.3  | 1.38±0.44 | 1.33±0.37         | 1.89±0.85 | 1.46±0.39 | 2.07±0.98 |
| Inferior Temporal            | 1.3±0.28  | 1.93±0.94 | 1.53±0.49 | 2.13±1.28 | 1.14±0.16 | 1.9±0.9   | 2.08±0.69 | 2.1±0.89  | 2.38±0.85         | 2.96±1.81 | 2.63±0.91 | 3.23±2    |
| Precuneus                    | 0.89±0.11 | 1.47±0.84 | 1.02±0.13 | 1.64±1.14 | 0.79±0.16 | 1.45±0.79 | 1.38±0.19 | 1.61±0.82 | 1.58±0.29         | 2.28±1.61 | 1.75±0.29 | 2.48±1.77 |
| <b>MRTM2 DVR</b>             |           |           |           |           |           |           |           |           |                   |           |           |           |
| Entorhinal                   | 1.04±0.12 | 1.75±0.63 | 1.13±0.18 | 1.93±0.82 | 0.99±0.1  | 1.77±0.64 | 1.41±0.23 | 1.48±0.22 | 1.58±0.32         | 2.44±0.84 | 1.83±0.49 | 2.75±1.06 |
| Amygdala                     | 0.81±0.11 | 1.39±0.49 | 0.86±0.12 | 1.52±0.65 | 0.78±0.12 | 1.41±0.5  | 1.07±0.13 | 1.18±0.2  | 1.19±0.16         | 1.87±0.64 | 1.31±0.22 | 2.16±0.79 |
| Inferior Temporal            | 1.16±0.15 | 2.3±1.08  | 1.28±0.25 | 2.58±1.41 | 1.1±0.11  | 2.33±1.1  | 1.6±0.32  | 1.87±0.47 | 1.8±0.44          | 3.12±1.4  | 2.12±0.69 | 3.74±1.89 |
| Precuneus                    | 0.93±0.08 | 2.2±1.45  | 0.99±0.1  | 2.52±1.86 | 0.9±0.08  | 2.24±1.48 | 1.23±0.11 | 1.71±0.65 | 1.38±0.17         | 2.86±1.78 | 1.52±0.24 | 3.63±2.5  |
| <b>Reference Logan DVR</b>   |           |           |           |           |           |           |           |           |                   |           |           |           |
| Entorhinal                   | 1.04±0.12 | 1.7±0.57  | 1.13±0.17 | 1.84±0.71 | 0.99±0.1  | 1.73±0.58 | 1.34±0.21 | 1.43±0.21 | 1.46±0.28         | 2.17±0.65 | 1.75±0.42 | 2.5±0.85  |
| Amygdala                     | 0.82±0.12 | 1.38±0.47 | 0.87±0.13 | 1.49±0.6  | 0.79±0.12 | 1.4±0.49  | 1.05±0.12 | 1.16±0.18 | 1.15±0.15         | 1.72±0.47 | 1.3±0.2   | 2.02±0.67 |
| Inferior Temporal            | 1.15±0.15 | 2.22±1    | 1.28±0.25 | 2.44±1.24 | 1.1±0.12  | 2.25±1.02 | 1.5±0.28  | 1.79±0.44 | 1.63±0.37         | 2.83±1.18 | 2.04±0.62 | 3.31±1.52 |
| Precuneus                    | 0.93±0.08 | 2.1±1.3   | 0.99±0.1  | 2.33±1.58 | 0.9±0.08  | 2.14±1.33 | 1.2±0.11  | 1.64±0.6  | 1.32±0.17         | 2.67±1.48 | 1.5±0.24  | 3.17±1.97 |
| <b>SUVR<sub>90-110</sub></b> |           |           |           |           |           |           |           |           |                   |           |           |           |
| Entorhinal                   | 1.14±0.16 | 2.12±0.9  | 1.34±0.25 | 2.57±1.4  | 1.06±0.14 | 2.17±0.95 | 1.58±0.28 | 1.6±0.26  | 1.73±0.38         | 2.44±0.84 | 2.41±0.58 | 3.84±1.52 |
| Amygdala                     | 0.8±0.21  | 1.64±0.72 | 0.94±0.23 | 1.98±1.1  | 0.75±0.22 | 1.68±0.77 | 1.1±0.19  | 1.23±0.25 | 1.19±0.23         | 1.87±0.64 | 1.66±0.31 | 2.97±1.21 |
| Inferior Temporal            | 1.25±0.18 | 2.71±1.43 | 1.47±0.29 | 3.31±2.11 | 1.16±0.15 | 2.78±1.49 | 1.74±0.37 | 1.98±0.5  | 1.92±0.5          | 3.11±1.4  | 2.66±0.71 | 4.94±2.46 |
| Precuneus                    | 0.89±0.14 | 2.51±1.87 | 1.04±0.17 | 3.13±2.68 | 0.83±0.15 | 2.58±1.95 | 1.23±0.14 | 1.75±0.74 | 1.34±0.23         | 2.86±1.77 | 1.87±0.36 | 4.58±3.18 |

**Supplementary Table 5.** Cross-sectional effect size (Hedge's  $g$  coefficients) for differentiating target region  $SUVR_{90-110}$  between diagnostic and  $A\beta$  status groups using the candidate reference regions. Values are expressed as mean (95% confidence interval estimated using bootstrap).

| <b>AD/MCI (n=8) and CN (n=24)</b>                                  |                   |                            |                   |                    |                         |                  |
|--------------------------------------------------------------------|-------------------|----------------------------|-------------------|--------------------|-------------------------|------------------|
|                                                                    | <b>CerGM</b>      | <b>CerGM<sub>3mm</sub></b> | <b>InfCer</b>     | <b>WM</b>          | <b>WM<sub>4mm</sub></b> | <b>Pons</b>      |
| <b>Entorhinal</b>                                                  | 1.37 (0.24,2.45)  | 1.47 (0.3,2.58)            | 1.1 (0.04,2.09)   | -0.04 (-0.82,0.74) | 1 (0.02,1.93)           | 1.1 (0.08,2.07)  |
| <b>Amygdala</b>                                                    | 1.48 (0.32,2.59)  | 1.55 (0.36,2.67)           | 1.21 (0.13,2.25)  | 0.58 (-0.26,1.41)  | 1.29 (0.22,2.31)        | 1.33 (0.23,2.38) |
| <b>Inferior Temporal</b>                                           | 1.29 (0.17,2.35)  | 1.36 (0.22,2.45)           | 1.09 (0.04,2.09)  | 0.45 (-0.4,1.28)   | 1.04 (0.04,2)           | 1.11 (0.07,2.1)  |
| <b>Precuneus</b>                                                   | 1.1 (0.04,2.12)   | 1.14 (0.06,2.16)           | 0.99 (-0.05,1.97) | 0.86 (-0.13,1.81)  | 1.06 (0.02,2.06)        | 1.06 (0.01,2.06) |
| <b><math>A\beta+</math> (n=18) and <math>A\beta-</math> (n=14)</b> |                   |                            |                   |                    |                         |                  |
|                                                                    | <b>CerGM</b>      | <b>CerGM<sub>3mm</sub></b> | <b>InfCer</b>     | <b>WM</b>          | <b>WM<sub>4mm</sub></b> | <b>Pons</b>      |
| <b>Entorhinal</b>                                                  | 0.89 (0.17,1.59)  | 0.78 (0.08,1.47)           | 0.97 (0.24,1.68)  | 0.18 (-0.52,0.87)  | 0.48 (-0.2,1.14)        | 0.37 (-0.3,1.04) |
| <b>Amygdala</b>                                                    | 1.17 (0.4,1.91)   | 1.19 (0.42,1.94)           | 1.03 (0.29,1.75)  | 1.3 (0.53,2.05)    | 1.11 (0.38,1.82)        | 0.81 (0.1,1.5)   |
| <b>Inferior Temporal</b>                                           | 0.78 (0.07,1.46)  | 0.84 (0.13,1.53)           | 0.71 (0.01,1.39)  | 0.19 (-0.5,0.88)   | 0.44 (-0.22,1.1)        | 0.4 (-0.27,1.06) |
| <b>Precuneus</b>                                                   | 0.68 (-0.01,1.35) | 0.72 (0.02,1.39)           | 0.64 (-0.05,1.31) | 0.45 (-0.22,1.11)  | 0.55 (-0.11,1.2)        | 0.5 (-0.17,1.15) |

**Supplementary Table 6.** Longitudinal effect size (Hedge's  $g$  coefficients) for detecting changes over a one-year period in target region  $SUVR_{90-110}$  in AD/MCI and in  $A\beta+$  individuals using the candidate reference regions. Values are expressed as mean (95% confidence interval estimated using bootstrap).

|                          | <b>AD/MCI (n=5)</b>               |                            |                    |                    |                         |                   |
|--------------------------|-----------------------------------|----------------------------|--------------------|--------------------|-------------------------|-------------------|
|                          | <b>CerGM</b>                      | <b>CerGM<sub>3mm</sub></b> | <b>InfCer</b>      | <b>WM</b>          | <b>WM<sub>4mm</sub></b> | <b>Pons</b>       |
| <b>Entorhinal</b>        | -0.12 (-0.35,0.18)                | -0.11 (-0.41,0.2)          | -0.13 (-0.57,0.11) | -0.28 (-2.01,0.37) | 0.01 (-1.36,0.55)       | 0.12 (-0.99,0.66) |
| <b>Amygdala</b>          | -0.03 (-0.22,0.17)                | -0.05 (-0.44,0.39)         | -0.06 (-0.68,0.14) | 0.03 (-0.18,0.14)  | 0.12 (-0.06,0.82)       | 0.2 (-0.06,1.12)  |
| <b>Inferior Temporal</b> | 0 (-0.19,0.56)                    | -0.02 (-0.26,0.42)         | -0.02 (-0.23,1.13) | 0.14 (-1.01,0.64)  | 0.14 (-0.28,0.71)       | 0.2 (-0.18,0.85)  |
| <b>Precuneus</b>         | -0.05 (-0.16,0.17)                | -0.07 (-0.28,0.07)         | -0.06 (-0.2,0.17)  | -0.05 (-0.34,0.26) | -0.02 (-0.44,0.26)      | 0.03 (-0.27,0.29) |
|                          | <b>A<math>\beta</math>+ (n=8)</b> |                            |                    |                    |                         |                   |
|                          | <b>CerGM</b>                      | <b>CerGM<sub>3mm</sub></b> | <b>InfCer</b>      | <b>WM</b>          | <b>WM<sub>4mm</sub></b> | <b>Pons</b>       |
| <b>Entorhinal</b>        | -0.08 (-0.31,0.11)                | -0.09 (-0.37,0.15)         | -0.09 (-0.35,0.13) | -0.1 (-0.77,0.51)  | 0.06 (-0.32,0.47)       | 0.12 (-0.23,0.53) |
| <b>Amygdala</b>          | 0 (-0.11,0.12)                    | -0.02 (-0.15,0.09)         | -0.02 (-0.17,0.13) | 0.12 (-0.17,0.47)  | 0.16 (-0.16,0.56)       | 0.19 (-0.05,0.51) |
| <b>Inferior Temporal</b> | -0.02 (-0.28,0.23)                | -0.04 (-0.36,0.26)         | -0.03 (-0.32,0.25) | -0.01 (-0.55,0.52) | 0.08 (-0.26,0.47)       | 0.13 (-0.25,0.57) |
| <b>Precuneus</b>         | -0.04 (-0.16,0.07)                | -0.06 (-0.25,0.11)         | -0.04 (-0.19,0.09) | -0.05 (-0.28,0.17) | -0.01 (-0.19,0.18)      | 0.04 (-0.18,0.29) |



**Supplementary Table 6.** Extracerebral [<sup>18</sup>F]MK-6240 uptake (SUVR<sub>90-110</sub>) at baseline and follow-ups for the high and low extracerebral uptake groups. The SUVR<sub>90-110</sub> values are expressed as mean ± standard deviation.

|                      | <b>High extracerebral (SUVR &gt;1.39)</b> |                        | <b>Low extracerebral (SUVR ≤1.39)</b> |                        |
|----------------------|-------------------------------------------|------------------------|---------------------------------------|------------------------|
|                      | <b>n</b>                                  | SUVR <sub>90-110</sub> | <b>n</b>                              | SUVR <sub>90-110</sub> |
| <b>Baseline (32)</b> | 16 (12 CN, 4 AD/MCI)                      | 2.01±0.70              | 16 (12 CN, 4 AD/MCI)                  | 1.14±0.14              |
| <b>6 months (26)</b> | 12 (8 CN, 4 AD/MCI)                       | 2.04±0.47              | 13 (12 CN, 1 AD/MCI)                  | 1.07±0.20              |
| <b>1 year (16)</b>   | 7 (3 CN, 4 AD/MCI)                        | 2.04±0.62              | 9 (8 CN, 1 AD/MCI)                    | 1.09±0.15              |

**Supplementary Figure 1.** Target region  $SUVR_{90-110}$  obtained using different reference regions for the CN and AD/MCI subjects.

**Target region  $SUVR_{90-110}$  in CN and AD/MCI subjects**

○ CN (n=24)    △ AD/MCI (n=8)

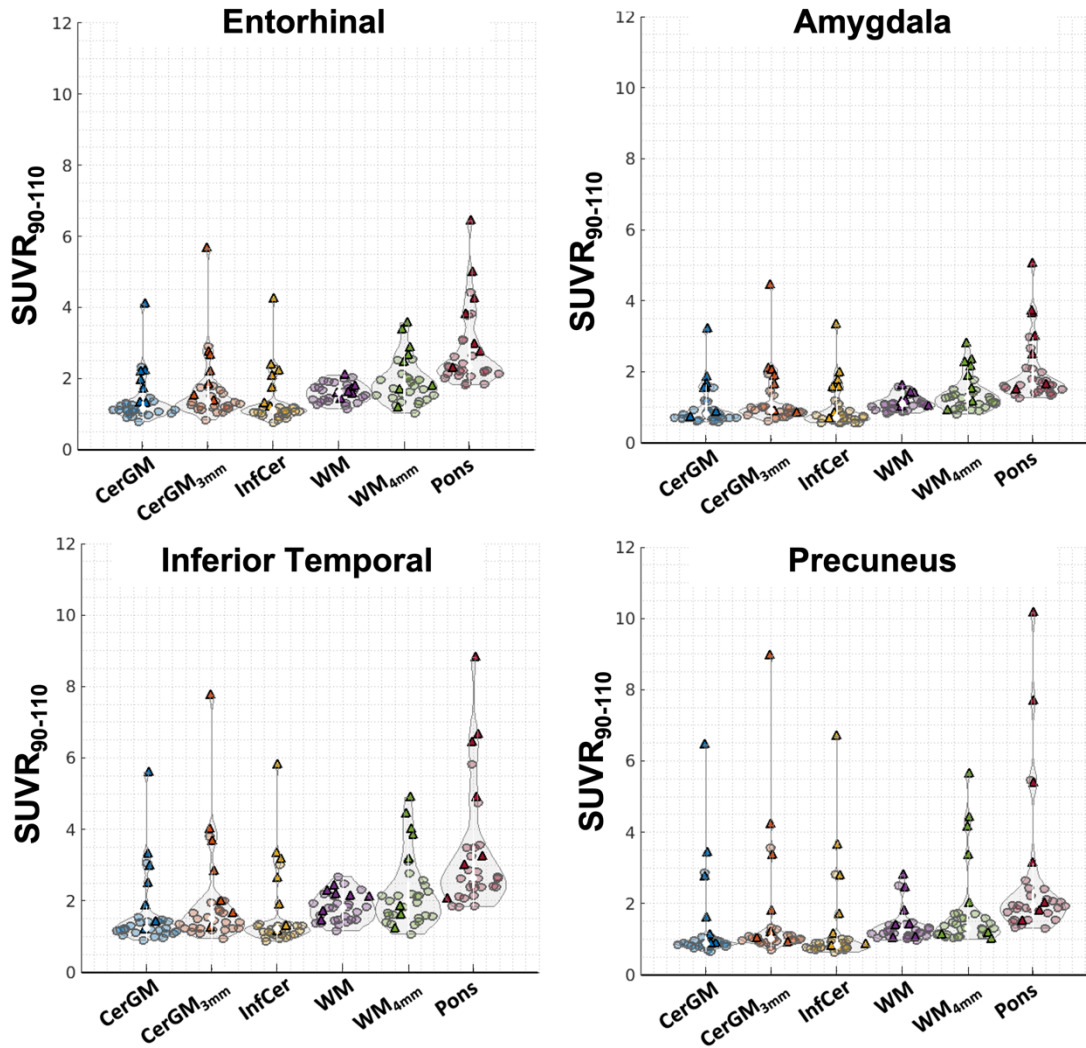

**Supplementary Figure 2.** Extracerebral SUVR<sub>90-110</sub> threshold. **a)** Histogram of extracerebral SUVR<sub>90-110</sub> identified a binary threshold of 1.39, **b)** which separated all subjects into high-extracerebral-signal and low-extracerebral-signal groups. Eroded CerGM by 3mm was used as the reference region.

**(a) Histogram of extracerebral SUVR<sub>90-110</sub>**

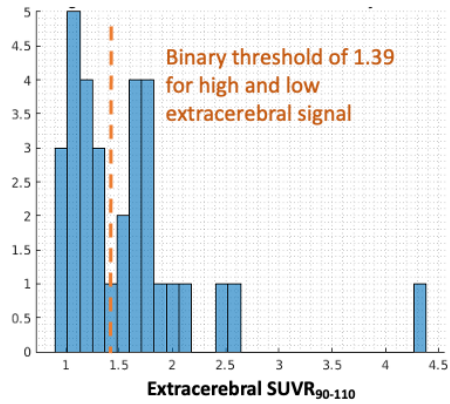

**(b) Extracerebral SUVR<sub>90-110</sub>**

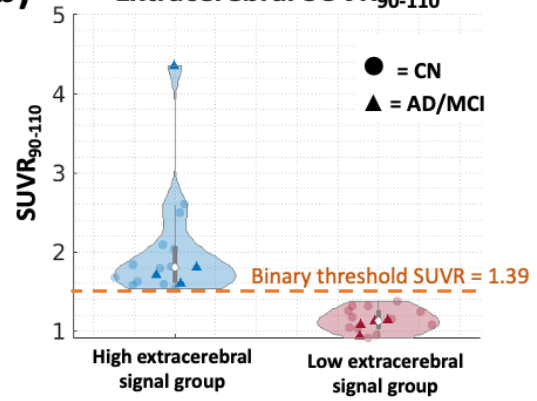

Supplement: sj-pdf-1-jcb-10.1177_0271678X221142139.pdf [file sj-pdf-1-jcb-10.1177_0271678X221142139.pdf]
